# Supplementary material for: Acute skeletal muscle wasting and dysfunction predict physical disability at hospital discharge in patients with critical illness
Source: Research Square preprint supplement (doi:10.21203/rs.3.rs-57908/v3), 2020-10-15
Supplement: Supplementary file 1 [file 84bafb97178333cb3fe68e43.docx]

Supplemental Figure 1: Flow diagram of patients screening, enrolled and participating.

^pre-existing neuromuscular, neurologic, or orthopedic condition that would prevent participation in functional tests; EtOH = alcoholic abuse; IVDU = intra-venous drug usage/abuse; BMI = body mass index; PLOF = prior level of function; LAR =legally authorized representative; US = ultrasound

Supplemental Figure 2: Receiver operator curve of multivariate logistic regression predicting ICU-AW at hospital discharge
